# Supplementary material for: Environmental Tobacco Smoke Exposure during Pregnancy and Child Neurodevelopment
Source: MDPI journal article supplement (doi:10.3390/ijerph14070796), 2017-07-17
Supplement: s1 [file s1]

# Supplementary Materials: Environmental Tobacco Smoke Exposure during Pregnancy and Child Neurodevelopment

Kinga Polanska, Anna Krol, Dorota Merez-Kot, Danuta Ligocka, Karolina Mikolajewska, Fiorino Mirabella, Flavia Chiarotti, Gemma Calamandrei and Wojciech Hanke

**Table S1.** Child and parental characteristics ( $N = 461$ ).

| Characteristic                                        | Respondents |      |
|-------------------------------------------------------|-------------|------|
|                                                       | <i>N</i>    | %    |
| <i>Qualitative Variables</i>                          |             |      |
| Sex                                                   |             |      |
| Boys                                                  | 214         | 46.4 |
| Girls                                                 | 247         | 53.6 |
| Breastfeeding                                         |             |      |
| No                                                    | 45          | 9.8  |
| Yes                                                   | 416         | 90.2 |
| Day care attendance at one year of age                |             |      |
| Yes                                                   | 31          | 7.7  |
| No                                                    | 371         | 92.3 |
| Day care attendance at two years of age               |             |      |
| Yes                                                   | 64          | 23.7 |
| No                                                    | 206         | 76.3 |
| Mode of delivery                                      |             |      |
| Cesarean                                              | 153         | 37.1 |
| Vaginal                                               | 259         | 62.9 |
| Parity                                                |             |      |
| 0                                                     | 248         | 53.8 |
| $\geq 1$                                              | 213         | 46.2 |
| Marital status                                        |             |      |
| Married                                               | 356         | 77.9 |
| Unmarried                                             | 101         | 22.1 |
| Maternal education                                    |             |      |
| Below high school level                               | 10          | 2.2  |
| High school                                           | 136         | 29.6 |
| University/college degree                             | 314         | 68.3 |
| Paternal education                                    |             |      |
| Below high school level                               | 16          | 3.5  |
| High school                                           | 235         | 51.8 |
| University/college degree                             | 203         | 44.7 |
| Socioeconomic status                                  |             |      |
| Low                                                   | 39          | 8.6  |
| Medium                                                | 323         | 70.1 |
| High                                                  | 92          | 20.3 |
| Alcohol                                               |             |      |
| Yes                                                   | 31          | 7.7  |
| No                                                    | 373         | 92.3 |
| <i>Quantitative variables</i>                         |             |      |
|                                                       | Mean        | SD   |
| Gestational age (weeks)                               | 39.2        | 1.4  |
| Birth weight (Kg)                                     | 3.4         | 0.5  |
| Maternal age at delivery                              | 29.2        | 4.3  |
| Paternal age at delivery                              | 31.0        | 5.4  |
| Maternal pre-pregnancy BMI ( $\text{kg}/\text{m}^2$ ) | 22.4        | 3.7  |

Missing data 0–10.6%.

**Table S2.** Characteristics of exposure and outcome variables ( $N = 461$ ).

| Characteristic                                                                             | Respondents |      |         |
|--------------------------------------------------------------------------------------------|-------------|------|---------|
|                                                                                            | N           | %    | % > LOQ |
| <i>Exposure Variables</i>                                                                  |             |      |         |
| ETS exposure during pregnancy based on cotinine cut-off (1.5 ng/mL)                        |             |      |         |
| 1st trimester of pregnancy                                                                 | 128/379     | 33.8 | 93.6    |
| 2nd trimester of pregnancy                                                                 | 100/286     | 35.0 | 96.9    |
| 3rd trimester of pregnancy                                                                 | 114/336     | 33.9 | 95.9    |
| Husband/partner smoking                                                                    |             |      |         |
| 1st trimester of pregnancy                                                                 | 136/449     | 30.3 |         |
| 2nd trimester of pregnancy                                                                 | 124/438     | 28.3 |         |
| 3rd trimester of pregnancy                                                                 | 113/419     | 27.0 |         |
| Smoking allowed at your home                                                               |             |      |         |
| 1st trimester of pregnancy                                                                 | 95/450      | 21.1 |         |
| 2nd trimester of pregnancy                                                                 | 81/439      | 18.5 |         |
| 3rd trimester of pregnancy                                                                 | 73/419      | 17.4 |         |
| Maternal smoking within one year after delivery                                            | 38/388      | 9.8  |         |
| Maternal smoking within two years after delivery                                           | 28/262      | 10.7 |         |
| Cotinine level in child urine collected at one year of age (ng/mL) GM $\pm$ SD; $N = 183$  | 2.4         | 5.2  | 79.2    |
| Cotinine level in child urine collected at two years of age (ng/mL) GM $\pm$ SD; $N = 140$ | 5.8         | 6.7  | 82.9    |
| <i>Outcome Variables</i>                                                                   | Mean        | SD   |         |
| Neurodevelopment score (Bayley 3rd edition)                                                |             |      |         |
| Cognitive (one year)                                                                       | 106.6       | 10.8 |         |
| Language (one year)                                                                        | 108.3       | 12.7 |         |
| Motor (one year)                                                                           | 105.0       | 13.3 |         |
| Cognitive (two years)                                                                      | 110.4       | 16.1 |         |
| Language (two years)                                                                       | 101.9       | 12.8 |         |
| Motor (two years)                                                                          | 112.0       | 14.6 |         |

LOQ: limit of quantification.

**Table S3.** ETS exposure during pregnancy based on selected indicators and psychomotor development at one and two years. Multiple linear regression model.

| Variables               | One-Year Old Children $\beta$ ( $p$ ) |                     |              | Two-Year Old Children $\beta$ ( $p$ ) |                     |                     |
|-------------------------|---------------------------------------|---------------------|--------------|---------------------------------------|---------------------|---------------------|
|                         | Cognitive                             | Language            | Motor        | Cognitive                             | Language            | Motor               |
| <i>First trimester</i>  |                                       |                     |              |                                       |                     |                     |
| Cotinine                | -2.59 (0.16)                          | <b>-5.05 (0.01)</b> | -0.64 (0.75) | <b>-4.55 (0.04)</b>                   | -3.90 (0.12)        | <b>-5.44 (0.05)</b> |
| Husband smoking         | <b>-4.89 (0.02)</b>                   | -0.85 (0.69)        | 0.72 (0.76)  | 3.71 (0.13)                           | -1.10 (0.69)        | 1.73 (0.56)         |
| Smoking allowed at home | 3.04 (0.24)                           | -0.45 (0.86)        | -1.76 (0.53) | -0.83 (0.78)                          | 3.70 (0.27)         | -0.77 (0.83)        |
| <i>Second trimester</i> |                                       |                     |              |                                       |                     |                     |
| Cotinine                | <b>-4.81 (0.02)</b>                   | <b>-5.11 (0.01)</b> | -0.06 (0.98) | <b>-7.06 (0.01)</b>                   | <b>-7.15 (0.01)</b> | -5.69 (0.08)        |
| Husband smoking         | <b>-6.59 (0.01)</b>                   | -3.55 (0.15)        | -3.03 (0.26) | 1.34 (0.66)                           | 0.42 (0.90)         | -0.84 (0.81)        |
| Smoking allowed at home | <b>6.53 (0.03)</b>                    | 3.85 (0.17)         | 1.53 (0.62)  | 0.36 (0.09)                           | 2.18 (0.52)         | 2.35 (0.54)         |
| <i>Third trimester</i>  |                                       |                     |              |                                       |                     |                     |
| Cotinine                | -3.19 (0.07)                          | <b>-3.71 (0.04)</b> | -1.32 (0.48) | 0.48 (0.84)                           | 2.45 (0.32)         | -1.12 (0.68)        |
| Husband smoking         | <b>-6.55 (0.004)</b>                  | -3.21 (0.16)        | -3.63 (0.12) | -0.69 (0.79)                          | -1.64 (0.56)        | 1.58 (0.62)         |
| Smoking allowed at home | 4.79 (0.07)                           | 2.79 (0.30)         | 2.35 (0.41)  | 2.66 (0.46)                           | 6.37 (0.09)         | 1.12 (0.79)         |

**Prenatal exposure indicators:** cotinine (0 = less than 1.5 ng/mL, 1 = equal or greater 1.5 ng/mL); husband smoking in the trimester of pregnancy (0 = No, 1 = Yes); smoking allowed at home in the trimester of pregnancy (0 = No, 1 = Yes). **Adjusted for:** socio-economic status (0 = low, 1 = medium, 2 = high), child sex (0 = girl, 1 = boys), mother's level of education (0 = below high school level, 1 = high school, 2 = university/college degree), mother's age at delivery (continuous variable, years), cotinine in child urine (ng/mL), Examiner. For the assessment at the age of one year: 1st trimester  $N = 149$ ; 2nd trimester = 120; 3rd trimester = 143. For the assessment at the age of two years: 1st trimester  $N = 116$ ; 2nd trimester = 94; 3rd trimester = 112. Data is reported as  $\beta$ —beta coefficients ( $p$ -values). Regression coefficients significantly different from 0 are reported in bold.

**Table S4.** Socio-economic status: Low/Medium. ETS exposure during pregnancy based on the cotinine level in saliva and child psychomotor development at one- and two-years of age. Multiple linear regression model.

| Cotinine      | One-Year Old Children $\beta$ ( $p$ ) |                     |              | Two-Year Old Children $\beta$ ( $p$ ) |                     |                     |
|---------------|---------------------------------------|---------------------|--------------|---------------------------------------|---------------------|---------------------|
|               | Cognitive                             | Language            | Motor        | Cognitive                             | Language            | Motor               |
| 1st trimester | -0.32 (0.82)                          | <b>-3.76 (0.01)</b> | -0.37 (0.80) | -2.76 (0.18)                          | <b>-5.34 (0.01)</b> | <b>-4.40 (0.03)</b> |
| 2nd trimester | -0.928 (0.57)                         | <b>-3.59 (0.03)</b> | -0.22 (0.89) | <b>-4.78 (0.04)</b>                   | <b>-5.66 (0.01)</b> | -3.90 (0.09)        |
| 3rd trimester | 1.54 (0.29)                           | -0.65 (0.66)        | 0.99 (0.51)  | -0.35 (0.87)                          | 0.65 (0.76)         | -3.63 (0.09)        |

**Cotinine value:** 0 = less than 1.5 ng/mL, 1 = equal to or greater than 1.5 ng/mL. **Adjusted for:** Child sex (0 = girl, 1 = boys), mother's level of education (0 = below high school level, 1 = high school, 2 = university/college degree), mother's age at delivery (continuous variable, years), Examiner. For the assessment at the age of one-year: 1st trimester = 284; 2nd trimester = 221; 3rd trimester = 256. For the assessment at the age of two-years: 1st trimester = 209; 2nd trimester = 170; 3rd trimester = 193. Data is reported as  $\beta$  (beta coefficients) ( $p$ -values). Regression coefficients significantly different from 0 are reported in bold.

**Table S5.** Socio-economic status: High. ETS exposure during pregnancy based on cotinine level in saliva and child psychomotor development at one- and two-years of age. Multiple linear regression model.

| Cotinine      | One-Year Old Children $\beta$ ( $p$ ) |              |             | Two-Year Old Children $\beta$ ( $p$ ) |              |              |
|---------------|---------------------------------------|--------------|-------------|---------------------------------------|--------------|--------------|
|               | Cognitive                             | Language     | Motor       | Cognitive                             | Language     | Motor        |
| 1st trimester | -0.74 (0.79)                          | 1.41 (0.66)  | 2.23 (0.58) | -2.53 (0.45)                          | 2.50 (0.47)  | -6.50 (0.16) |
| 2nd trimester | -0.20 (0.95)                          | -3.85 (0.30) | 0.69 (0.89) | -1.56 (0.72)                          | -1.50 (0.67) | -8.46 (0.10) |
| 3rd trimester | -1.44 (0.70)                          | -1.35 (0.65) | 0.27 (0.94) | -0.89 (0.82)                          | 0.21 (0.95)  | -5.75 (0.18) |

**Cotinine value:** 0 = less than 1.5 ng/mL, 1 = equal to or greater than 1.5 ng/mL. **Adjusted for:** Child sex (0 = girl, 1 = boys), mother's level of education (0 = below high school level, 1 = high school, 2 = university/college degree), mother's age at delivery (continuous variable, years), Examiner. For the assessment at the age of one-year: 1st trimester = 71; 2nd trimester = 44; 3rd trimester = 66. For the assessment at the age of two-years: 1st trimester = 42; 2nd trimester = 29; 3rd trimester = 39. Data is reported as  $\beta$  (beta coefficients) ( $p$ -values).

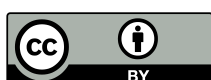

© 2017 by the authors; licensee MDPI, Basel, Switzerland. This article is an open access article distributed under the terms and conditions of the Creative Commons by Attribution (CC-BY) license (<http://creativecommons.org/licenses/by/4.0/>).
